# Supplementary material for: Quantifying the life-cycle health impacts of a cobalt-containing lithium-ion battery
Source: Springer Nature journal article supplement (doi:10.1007/s11367-022-02084-3), 2022-08-01
Supplement: MOESM1 [file 23359398]

# SUPPORTING INFORMATION

## Quantifying the life-cycle health impacts of a cobalt-containing lithium-ion battery

Rickard Arvidsson,\* Mudit Chordia and Anders Nordelöf

Environmental Systems Analysis, Chalmers University of Technology, Rännvägen 6, 41296,  
Gothenburg, Sweden

\* Corresponding author: [rickard.arvidsson@chalmers.se](mailto:rickard.arvidsson@chalmers.se), +46 31 772 2161.

### **Content:**

- Table S1
- Table S2
- Table S3
- Table S4
- Table S5
- Table S6
- Table S7
- References

**Table S1.** Implementation of work-environment characterization factors (CF<sub>WE</sub>) in processes of the production system. Work environment categories were obtained from Scanlon et al. (2015), except for the artisanal cobalt mining. **Bold** processes are created by the authors, mainly based on Dai et al. (2018), *italic* processed are from Chordia et al. (2021) and all other processes are from the Ecoinvent database (version 3.7.1). The processes have been categorized to the category deemed most suitable.

| <b>Work environment categories</b>                      | <b>Processes</b>                                                                                                                                                                                                                                                                                                                                                                                                                                                                                                                                                                                                                                                                                                                                                                                                                                                                                                                                               |
|---------------------------------------------------------|----------------------------------------------------------------------------------------------------------------------------------------------------------------------------------------------------------------------------------------------------------------------------------------------------------------------------------------------------------------------------------------------------------------------------------------------------------------------------------------------------------------------------------------------------------------------------------------------------------------------------------------------------------------------------------------------------------------------------------------------------------------------------------------------------------------------------------------------------------------------------------------------------------------------------------------------------------------|
| Artisanal cobalt mining                                 | <b>Copper-cobalt ore mining, artisanal</b>                                                                                                                                                                                                                                                                                                                                                                                                                                                                                                                                                                                                                                                                                                                                                                                                                                                                                                                     |
| 212234 Copper Ore and Nickel Ore Mining                 | <b>Copper-cobalt ore mining, industrial</b>                                                                                                                                                                                                                                                                                                                                                                                                                                                                                                                                                                                                                                                                                                                                                                                                                                                                                                                    |
| 325188 All Other Basic Inorganic Chemical Manufacturing | <p><b>Battery-grade cobalt sulfate production</b><br/> market for ammonium bicarbonate   ammonium bicarbonate   Cutoff, U<br/> market for hydrochloric acid, without water, in 30% solution state   hydrochloric acid, without water, in 30% solution state   Cutoff, U<br/> market for soda ash, dense   soda ash, dense   Cutoff, U<br/> <i>Sodium metabisulfite production</i><br/> market for sulfuric acid   sulfuric acid   Cutoff, U<br/> market for magnesium oxide   magnesium oxide   Cutoff, U<br/> market for ammonia, anhydrous, liquid   ammonia, anhydrous, liquid   Cutoff, U<br/> market for lithium hydroxide   lithium hydroxide   Cutoff, U<br/> market for manganese sulfate   manganese sulfate   Cutoff, U<br/> market for nickel sulfate   nickel sulfate   Cutoff, U<br/> market for lithium hexafluorophosphate   lithium hexafluorophosphate   Cutoff, U<br/> market for chemicals, inorganic   chemical, inorganic   Cutoff, U</p> |
| 325199 All Other Basic Organic Chemical Manufacturing   | <p>market for carboxymethyl cellulose, powder   carboxymethyl cellulose, powder   Cutoff, U<br/> market for N-methyl-2-pyrrolidone   N-methyl-2-pyrrolidone   Cutoff, U<br/> market for tetrachloroethylene   tetrachloroethylene   Cutoff, U<br/> market for chemical, organic   chemical, organic   Cutoff, U<br/> market for dimethyl carbonate   dimethyl carbonate   Cutoff, U<br/> market for ethylene carbonate   ethylene carbonate   Cutoff, U<br/> market for butadiene   butadiene   Cutoff, U<br/> market for styrene   styrene   Cutoff, U</p>                                                                                                                                                                                                                                                                                                                                                                                                    |
| 331411 Primary Smelting and Refining of Copper          | <p><b>Hydrometallurgical ore processing</b><br/> market for copper, cathode   copper, cathode   Cutoff, U</p>                                                                                                                                                                                                                                                                                                                                                                                                                                                                                                                                                                                                                                                                                                                                                                                                                                                  |
| 324110 Petroleum Refineries                             | <p>market for kerosene   kerosene   Cutoff, U<br/> market for sulfur   sulfur   Cutoff, U</p>                                                                                                                                                                                                                                                                                                                                                                                                                                                                                                                                                                                                                                                                                                                                                                                                                                                                  |

|                                                           |                                                                                                                                                                                                                                                                                                                                        |
|-----------------------------------------------------------|----------------------------------------------------------------------------------------------------------------------------------------------------------------------------------------------------------------------------------------------------------------------------------------------------------------------------------------|
|                                                           | market for diesel, burned in building machine   diesel, burned in building machine   Cutoff, U<br>market for paraffin   paraffin   Cutoff, U                                                                                                                                                                                           |
| 327410 Lime Manufacturing                                 | market for lime, hydraulic   lime, hydraulic   Cutoff, U                                                                                                                                                                                                                                                                               |
| 212399 All Other Nonmetallic Mineral Mining               | market for limestone, crushed, for mill   limestone, crushed, for mill   Cutoff, U                                                                                                                                                                                                                                                     |
| 325181 Alkalies and Chlorine Manufacturing                | market for sodium hydroxide, without water, in 50% solution state   sodium hydroxide, without water, in 50% solution state   Cutoff, U                                                                                                                                                                                                 |
| 221112 Fossil Fuel Electric Power Generation              | market for electricity, medium voltage   electricity, medium voltage   Cutoff, U – CN-SGCC<br>market for electricity, medium voltage   electricity, medium voltage   Cutoff, U – KR<br>market group for electricity, medium voltage   electricity, medium voltage   Cutoff, U                                                          |
| 211111 Crude Petroleum and Natural Gas Extraction         | market for heat, central or small-scale, natural gas   heat, central or small-scale, natural gas   Cutoff, U<br>market for heat, from steam, in chemical industry   heat, from steam, in chemical industry   Cutoff, U<br>market for heat, district or industrial, natural gas   heat, district or industrial, natural gas   Cutoff, U |
| 221119 Other Electric Power Generation                    | market for electricity, medium voltage   electricity, medium voltage   Cutoff, U – CD<br>market for electricity, medium voltage   electricity, medium voltage   Cutoff, U – SE                                                                                                                                                         |
| 484121 General Freight Trucking, Long-Distance, Truckload | market group for transport, freight, lorry, unspecified   transport, freight, lorry, unspecified   Cutoff, U                                                                                                                                                                                                                           |
| 483111 Deep Sea Freight Transportation                    | market for transport, freight, sea, bulk carrier for dry goods   transport, freight, sea, bulk carrier for dry goods   Cutoff, U                                                                                                                                                                                                       |
| 334412 Bare Printed Circuit Board Manufacturing           | <i>Lithium-ion cell production in gigafactory</i>                                                                                                                                                                                                                                                                                      |
| 562211 Hazardous Waste Treatment and Disposal             | market for hazardous waste, for incineration   hazardous waste, for incineration   Cutoff, U                                                                                                                                                                                                                                           |
| 325182 Carbon Black Manufacturing                         |                                                                                                                                                                                                                                                                                                                                        |
| 325211 Plastics Material and Resin Manufacturing          | market for polyvinylfluoride   polyvinylfluoride   Cutoff, U<br>market for polyethylene, high density, granulate   polyethylene, high density, granulate   Cutoff, U                                                                                                                                                                   |
| 325120 Industrial Gas Manufacturing                       | market for oxygen, liquid   oxygen, liquid   Cutoff, U<br>market for nitrogen, liquid   nitrogen, liquid   Cutoff, U                                                                                                                                                                                                                   |

|                                                                                       |                                                                                                                                                                     |
|---------------------------------------------------------------------------------------|---------------------------------------------------------------------------------------------------------------------------------------------------------------------|
| 221310 Water Supply and Irrigation Systems                                            | market for water, deionised   water, deionised   Cutoff, U                                                                                                          |
| 236210 Industrial Building Construction                                               | market for electronic component factory   electronic component factory   Cutoff, U<br>U<br>market for precious metal refinery   precious metal refinery   Cutoff, U |
| 562212 Solid Waste Landfill                                                           | market for waste polypropylene   waste polypropylene   Cutoff, U (80%)                                                                                              |
| 562213 Solid Waste Combustors and Incinerators                                        | market for waste polypropylene   waste polypropylene   Cutoff, U (20%)<br>market for waste rubber, unspecified   waste rubber, unspecified   Cutoff, U              |
| 482111 Line-Haul Railroads                                                            | market group for transport, freight train   transport, freight train   Cutoff, U                                                                                    |
| 212112 Bituminous Coal Underground Mining                                             | market for graphite, battery grade   graphite, battery grade   Cutoff, U                                                                                            |
| 111110 Soybean Farming                                                                | market for fatty acid   fatty acid   Cutoff, U (40%)                                                                                                                |
| 111120 Oilseed (except Soybean) Farming                                               | market for fatty acid   fatty acid   Cutoff, U (60%)                                                                                                                |
| 331312 Primary Aluminum Production                                                    | market for aluminium, wrought alloy   aluminium, wrought alloy   Cutoff, U (70%)                                                                                    |
| 331111 Iron and Steel Mills                                                           | market for steel, low-alloyed, hot rolled   steel, low-alloyed, hot rolled   Cutoff, U<br>U                                                                         |
| 331314 Secondary Smelting and Alloying of Aluminum                                    | market for aluminium, wrought alloy   aluminium, wrought alloy   Cutoff, U (30%)                                                                                    |
| 331419 Primary Smelting and Refining of Nonferrous Metal (except Copper and Aluminum) | market for nickel, class 1   nickel, class 1   Cutoff, U                                                                                                            |

**Table S2.** Mining of cobalt in 2020. Source: Shedd (2020).

| <b>Country</b>   | <b>Cobalt mined (metric tons)</b> | <b>Cobalt mined (%)</b> |
|------------------|-----------------------------------|-------------------------|
| DRC              | 95,000                            | 70%                     |
| Russia           | 6,300                             | 5%                      |
| Australia        | 5,700                             | 4%                      |
| Philippines      | 4,700                             | 3%                      |
| Cuba             | 3,600                             | 3%                      |
| Canada           | 3,200                             | 2%                      |
| Papua New Guinea | 2,800                             | 2%                      |
| China            | 2,300                             | 2%                      |
| Morocco          | 1,900                             | 1%                      |
| South Africa     | 1,800                             | 1%                      |
| Madagascar       | 700                               | 1%                      |
| United States    | 600                               | <1%                     |
| Other countries  | 6,400                             | 5%                      |
| Total            | 135,000                           | 100%                    |

**Table S3.** Unit process dataset for artisanal copper-cobalt mining in the DRC. CD=the DRC.

| <b>Input flow</b>        | <b>Flow type</b>                       | <b>Amount</b> | <b>Unit</b> | <b>Linked upstream process</b>   |
|--------------------------|----------------------------------------|---------------|-------------|----------------------------------|
| Cobalt                   | Elementary flow,<br>resource in ground | 0.0047        | kg          | -                                |
| Copper                   | Elementary flow,<br>resource in ground | 0.024         | kg          | -                                |
| Inert rock               | Elementary flow,<br>resource in ground | 0.97          | kg          | -                                |
| <b>Output flow</b>       | <b>Flow type</b>                       | <b>Amount</b> | <b>Unit</b> | <b>Linked downstream process</b> |
| Copper-cobalt ore,<br>CD | Product flow                           | 1             | kg          | -                                |

**Table S4.** Unit process dataset for industrial copper-cobalt mining in the DRC. CD=the DRC, GLO=global, U=linked to unit process datasets. Source: Dai et al. (2018).

| <b>Input flow</b>                     | <b>Flow type</b>                       | <b>Amount</b> | <b>Unit</b>    | <b>Linked upstream process</b>                                                                       |
|---------------------------------------|----------------------------------------|---------------|----------------|------------------------------------------------------------------------------------------------------|
| Cobalt                                | Elementary flow, resource, in ground   | 0.0047        | kg             | -                                                                                                    |
| Copper                                | Elementary flow, resource, in ground   | 0.024         | kg             | -                                                                                                    |
| Inert rock                            | Elementary flow, resource, in ground   | 0.97          | kg             | -                                                                                                    |
| Water, unspecified natural origin, CD | Elementary flow, resource, unspecified | 0.00017       | m <sup>3</sup> | -                                                                                                    |
| Diesel, burned in building machine    | Product flow                           | 0.16          | kWh            | market for diesel, burned in building machine   diesel, burned in building machine   Cutoff, U - GLO |
| <b>Output flow</b>                    | <b>Flow type</b>                       | <b>Amount</b> | <b>Unit</b>    | <b>Linked downstream process</b>                                                                     |
| Copper-cobalt ore, CD                 | Product flow                           | 1             | kg             | -                                                                                                    |
| Particulates, <10 µm                  | Elementary flow, emission to air       | 0.0014        | kg             | -                                                                                                    |
| Particulates, <2.5 µm                 | Elementary flow, emission to air       | 0.00015       | kg             | -                                                                                                    |

**Table S5.** Unit process dataset for hydrometallurgical ore processing in the DRC. CD=the DRC, RoW=rest of world, U=linked to unit process datasets. Source: Dai et al. (2018) with economic allocation between copper (7,300 USD/ton) and the cobalt content in the crude cobalt hydroxide (43,000 USD/ton).

| <b>Input flow</b>                                      | <b>Flow type</b>                       | <b>Amount</b> | <b>Unit</b> | <b>Linked upstream process</b>                                                                                                               |
|--------------------------------------------------------|----------------------------------------|---------------|-------------|----------------------------------------------------------------------------------------------------------------------------------------------|
| Copper-cobalt ore                                      | Product flow                           | 46            | kg          | 80% Industrial copper-cobalt mining in the DRC -CD (Table S4)<br>20% Artisanal copper-cobalt mining in the DRC - CD Table S3)                |
| Electricity, medium voltage                            | Product flow                           | 4.1           | kWh         | market for electricity, medium voltage   electricity, medium voltage   Cutoff, U - CD                                                        |
| Lime, hydraulic                                        | Product flow                           | 0.70          | kg          | market for lime, hydraulic   lime, hydraulic   Cutoff, U - RoW                                                                               |
| Limestone, crushed, for mill                           | Product flow                           | 1.9           | kg          | market for limestone, crushed, for mill   limestone, crushed, for mill   Cutoff, U - RoW                                                     |
| Magnesium oxide                                        | Product flow                           | 0.32          | kg          | market for magnesium oxide   magnesium oxide   Cutoff, U - GLO                                                                               |
| Sodium hydroxide, without water, in 50% solution state | Product flow                           | 0.085         | kg          | market for sodium hydroxide, without water, in 50% solution state   sodium hydroxide, without water, in 50% solution state   Cutoff, U - GLO |
| Sulfur                                                 | Product flow                           | 1.5           | kg          | market for sulfur   sulfur   Cutoff, U - GLO                                                                                                 |
| Transport, freight, lorry, unspecified                 | Product flow                           | 2.7           | t•km        | market group for transport, freight, lorry, unspecified   transport, freight, lorry, unspecified   Cutoff, U - GLO                           |
| Transport, freight, sea, bulk carrier for dry goods    | Product flow                           | 13            | t•km        | market for transport, freight, sea, bulk carrier for dry goods   transport, freight, sea, bulk carrier for dry goods   Cutoff, U - GLO       |
| Water, unspecified natural origin, CD                  | Elementary flow, resource, unspecified | 70            | liter       | -                                                                                                                                            |
| <b>Output flow</b>                                     | <b>Flow type</b>                       | <b>Amount</b> | <b>Unit</b> | <b>Linked downstream process</b>                                                                                                             |
| Crude cobalt hydroxide, CD                             | Product flow                           | 1             | kg          | -                                                                                                                                            |
| Sulfur dioxide                                         | Elementary flow, emission to air       | 0.014         | kg          | -                                                                                                                                            |
| Oxidic tailings                                        | Waste flow                             | 22            | kg          | market for non-sulfidic tailing, off-site   non-sulfidic tailing, off-site   Cutoff, U - GLO                                                 |
| Sulfidic tailings                                      | Waste flow                             | 22            | kg          | market for sulfidic tailings, from copper mine operation   sulfidic tailings, from copper mine operation   Cutoff, U - ZM                    |



**Table S6.** Unit process dataset for battery-grade cobalt sulfate production in China. CD=the DRC, CN=China, RoW=rest of world, GLO=global, U=linked to unit process datasets, SGCC=State Grid Corporation of China, ZJ=Zhejiang. Source: Dai et al. (2018).

| <b>Input flow</b>                                       | <b>Flow type</b>                       | <b>Amount</b> | <b>Unit</b>    | <b>Linked upstream process</b>                                                                                                                 |
|---------------------------------------------------------|----------------------------------------|---------------|----------------|------------------------------------------------------------------------------------------------------------------------------------------------|
| Crude cobalt hydroxide, CD                              | Product flow                           | 1.1           | kg             | Hydrometallurgical ore processing - CD (Table S5)                                                                                              |
| Ammonium bicarbonate                                    | Product flow                           | 0.22          | kg             | market for ammonium bicarbonate   ammonium bicarbonate   Cutoff, U - RoW                                                                       |
| Hydrochloric acid, without water, in 30% solution state | Product flow                           | 1.8           | kg             | market for hydrochloric acid, without water, in 30% solution state   hydrochloric acid, without water, in 30% solution state   Cutoff, U - RoW |
| Kerosene                                                | Product flow                           | 0.019         | kg             | market for kerosene   kerosene   Cutoff, U - RoW                                                                                               |
| Lime, hydraulic                                         | Product flow                           | 0.0076        | kg             | market for lime, hydraulic   lime, hydraulic   Cutoff, U - Row                                                                                 |
| Limestone, crushed, for mill                            | Product flow                           | 0.023         | kg             | market for limestone, crushed, for mill   limestone, crushed, for mill   Cutoff, U - Row                                                       |
| Soda ash, dense                                         | Product flow                           | 0.034         | kg             | market for soda ash, dense   soda ash, dense   Cutoff, U - GLO                                                                                 |
| Sodium hydroxide, without water, in 50% solution state  | Product flow                           | 3.3           | kg             | market for sodium hydroxide, without water, in 50% solution state   sodium hydroxide, without water, in 50% solution state   Cutoff, U - GLO   |
| Sodium metabisulfite                                    | Product flow                           | 0.030         | kg             | Production of metabisulfite (Table S7)                                                                                                         |
| Sulfuric acid                                           | Product flow                           | 1.0           | kg             | market for sulfuric acid   sulfuric acid   Cutoff, U - RoW                                                                                     |
| Electricity, medium voltage                             | Product flow                           | 1.2           | kWh            | market for electricity, medium voltage   electricity, medium voltage   Cutoff, U - SGCC                                                        |
| Heat, central or small-scale, natural gas               | Product flow                           | 1.2           | MJ             | market for heat, central or small-scale, natural gas   heat, central or small-scale, natural gas   Cutoff, U - RoW                             |
| Heat, from steam, in chemical industry                  | Product flow                           | 7.7           | MJ             | market for heat, from steam, in chemical industry   heat, from steam, in chemical industry   Cutoff, U - RoW                                   |
| Water, unspecified natural origin, CN                   | Elementary flow, resource, unspecified | 0.019         | m <sup>3</sup> | -                                                                                                                                              |
| <b>Output flow</b>                                      | <b>Flow type</b>                       | <b>Amount</b> | <b>Unit</b>    | <b>Linked downstream process</b>                                                                                                               |
| Battery-grade cobalt sulfate, CN-ZJ                     | Product flow                           | 1             | kg             | -                                                                                                                                              |

**Table S7.** Unit process dataset for production of sodium metabisulfite. Source: Dai et al. (2018).

| <b>Input flow</b>                                      | <b>Flow type</b> | <b>Amount</b> | <b>Unit</b> | <b>Linked upstream process</b>                                                                                                               |
|--------------------------------------------------------|------------------|---------------|-------------|----------------------------------------------------------------------------------------------------------------------------------------------|
| Sodium hydroxide, without water, in 50% solution state | Product flow     | 0.42          | kg          | market for sodium hydroxide, without water, in 50% solution state   sodium hydroxide, without water, in 50% solution state   Cutoff, U - GLO |
| <b>Output flow</b>                                     | <b>Flow type</b> | <b>Amount</b> | <b>Unit</b> | <b>Linked downstream process</b>                                                                                                             |
| Sodium metabisulfite, GLO                              | Product flow     | 1             | kg          | -                                                                                                                                            |

## References

- Chordia M, Nordelöf A, Ellingsen LA-W (2021) Environmental life cycle implications of upscaling lithium-ion battery production. *The International Journal of Life Cycle Assessment* 26:2024-2039
- Dai Q, Kelly JC, Elgowainy A (2018) Cobalt Life Cycle Analysis Update for the GREET® Model. Argonne National Laboratory,
- Scanlon KA, Lloyd SM, Gray GM, Francis RA, LaPuma P (2015) An Approach to Integrating Occupational Safety and Health into Life Cycle Assessment: Development and Application of Work Environment Characterization Factors. *Journal of Industrial Ecology* 19(1): 27-37
- Shedd KB (2020) Mineral Commodity Summary: Cobalt. United States Geological Survey,
